# Supplementary material for: Effect of Chemical Agents on the Morphology and Chemical Structures of Microplastics
Source: MDPI journal article supplement (doi:10.3390/polym14204353), 2022-10-15
Supplement: s1 [file s1]

## **Supplementary data**

# **Effect of Chemical Agents on the Morphology and Chemical Structures of Microplastics**

Hak Bong Lee<sup>a</sup>, Kyong Sub Lee<sup>a</sup>, Seok Jun Kim<sup>b</sup>, Byung Il Choi<sup>b</sup>, Byung Rye Go<sup>c</sup>, Chan Joo Rhu<sup>d</sup>, and Tae Hee Han<sup>a,e\*</sup>

<sup>a</sup>Department of Organic and Nano Engineering, Hanyang University, Seoul 04763, Republic of Korea

<sup>b</sup>Materials & Components Research Institute, Korea Testing & Research Institute, Gyeonggi-do 13810, Republic of Korea

<sup>c</sup>Products Conformity Center, Korea Conformity Laboratories, Seoul 06711, Republic of Korea

<sup>d</sup>Consumer Product Center, Korea Conformity Laboratories, Seoul 06711, Republic of Korea

<sup>e</sup>The Research Institute of Industrial Science, Hanyang University, Seoul 04763, Republic of Korea

**\*Corresponding Authors**

Prof. Tae Hee Han (T. H. Han)

E-mail: [than@hanyang.ac.kr](mailto:than@hanyang.ac.kr)

**Keywords:** microplastic, chemical resistance, chemical digestion, degradation

Keywords: microplastic, strong acid, chemical resistance, polymer, chemical digestion

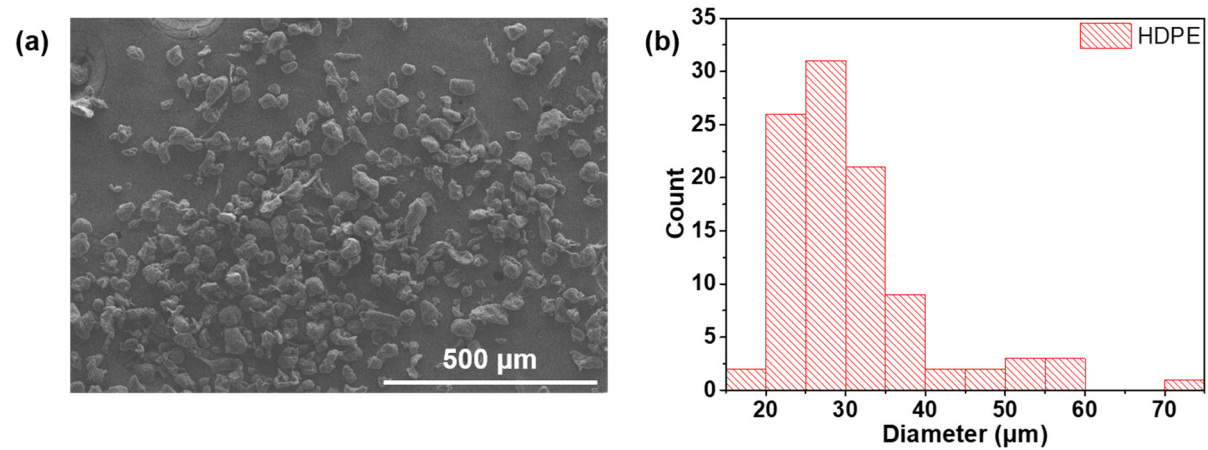

**Figure S1.** (a) SEM image of the HDPE MP model samples and (b) size-distribution graph.

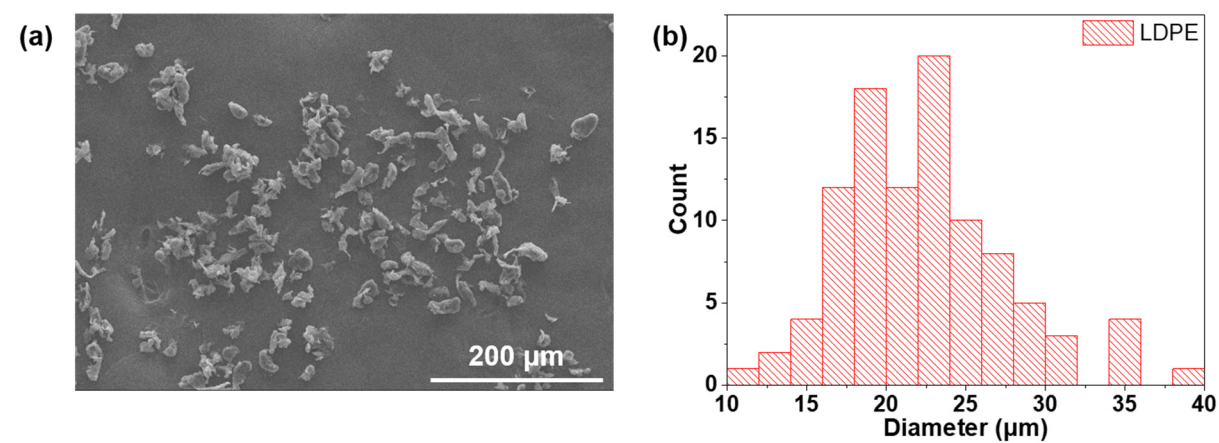

**Figure S2.** (a) SEM image of the LDPE MP model samples and (b) size-distribution graph.

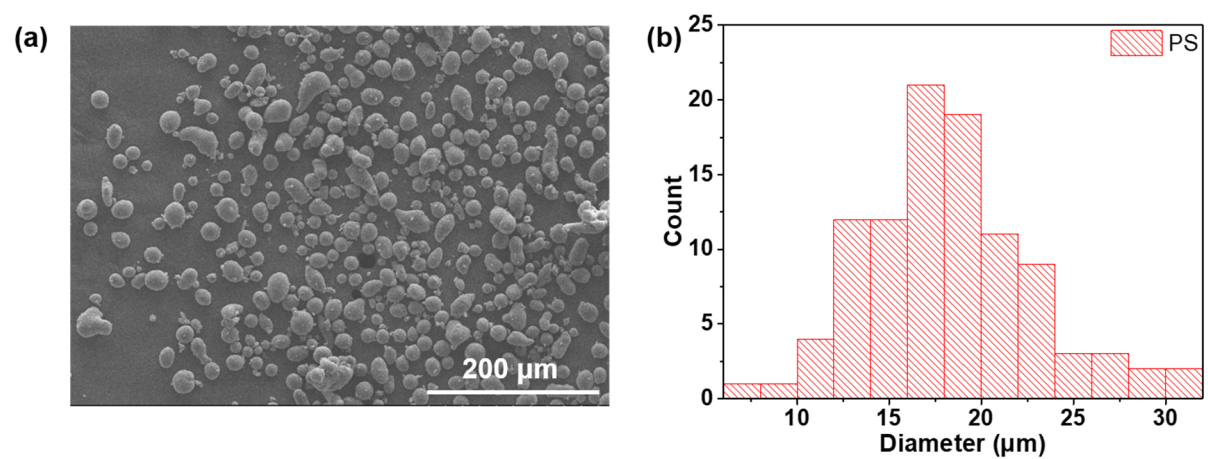

**Figure S3.** (a) SEM image of the PS MP model samples and (b) size-distribution graph.

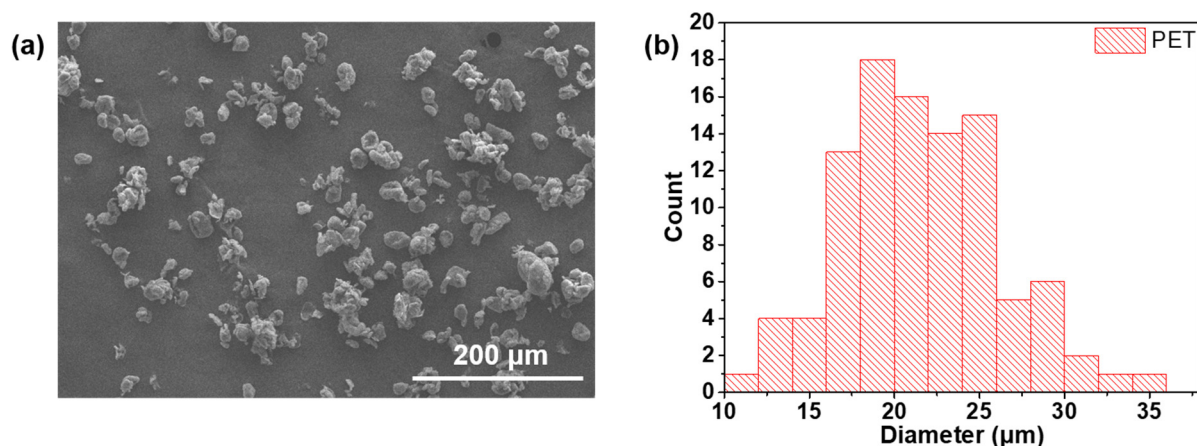

**Figure S4.** (a) SEM image of the PET MP model samples and (b) size-distribution graph.

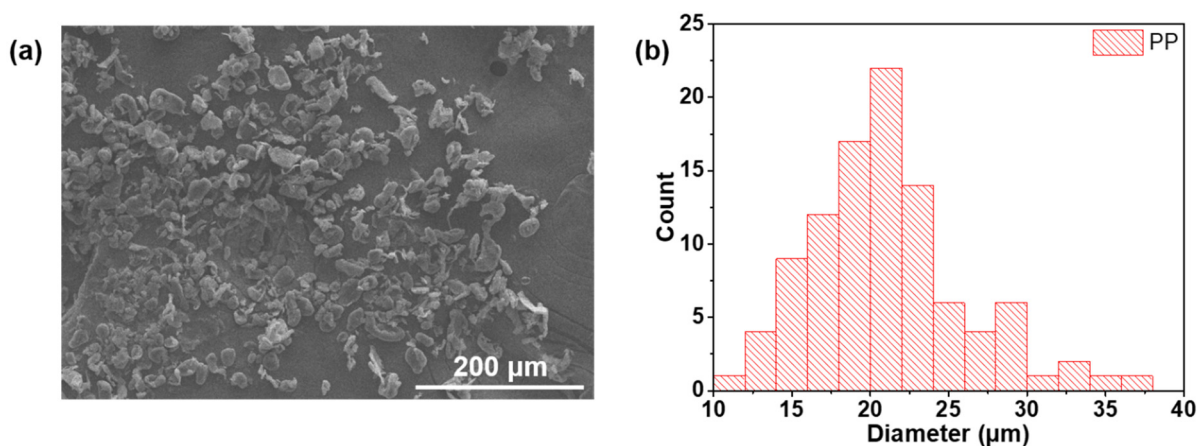

**Figure S5.** (a) SEM image of the PP MP model samples and (b) size-distribution graph.

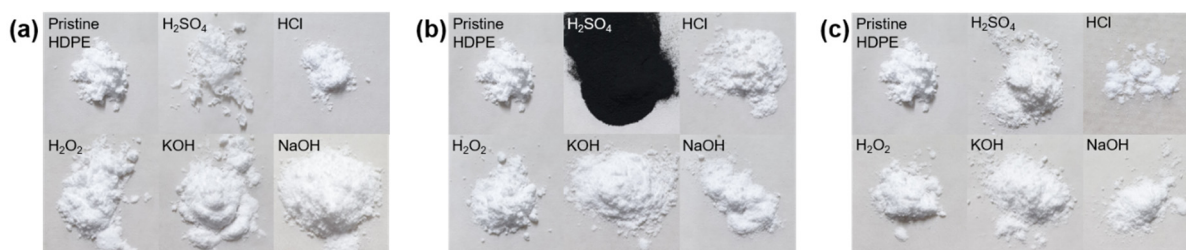

**Figure S6.** Photographs of the HDPE samples in the pristine state, following chemical stability tests against strong acids and alkalis ( $H_2SO_4$ ,  $HCl$ ,  $H_2O_2$ ,  $KOH$ , and  $NaOH$ ) used in the chemical digestion procedure at (a) 25 °C for 1 d, (b) 70 °C for 1 d, and (c) 25 °C for 7 d.

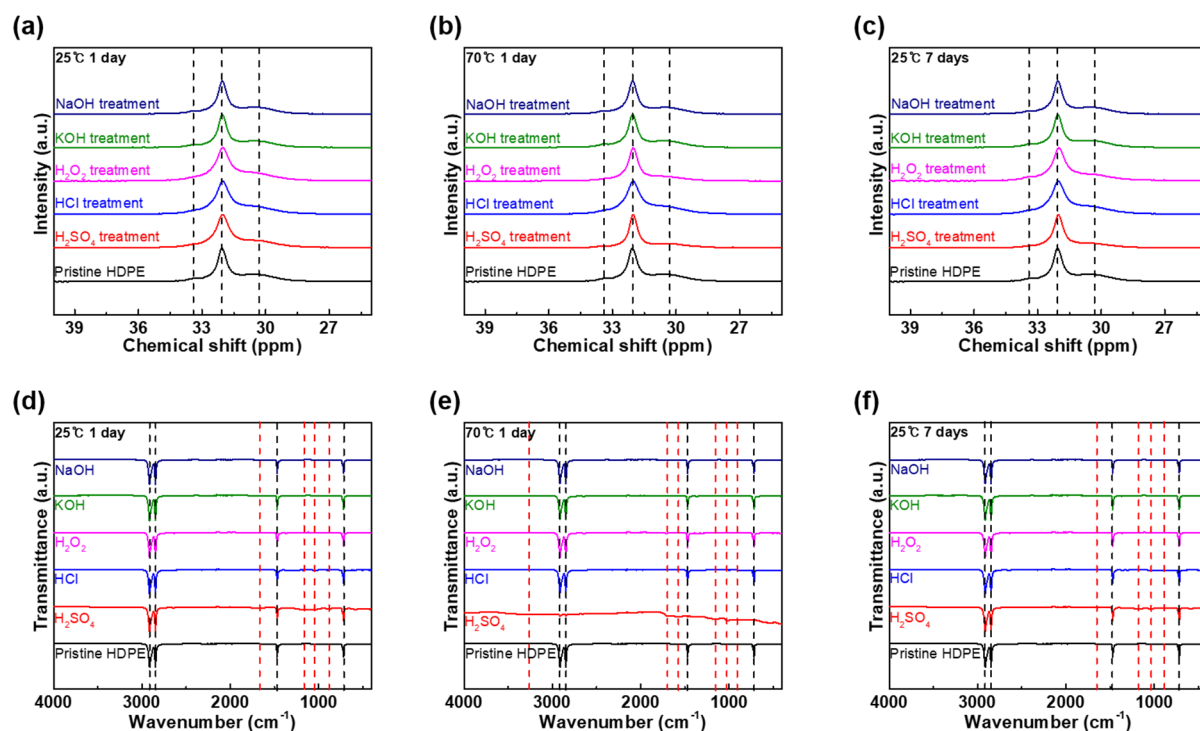

**Figure S7.**  $^{13}\text{C}$  NMR spectra of pristine HDPE and the HDPE samples after reaction with  $\text{H}_2\text{SO}_4$ ,  $\text{HCl}$ ,  $\text{H}_2\text{O}_2$ ,  $\text{KOH}$ , and  $\text{NaOH}$  at (a)  $25\text{ }^\circ\text{C}$  for 1 d, (b)  $70\text{ }^\circ\text{C}$  for 1 d, and (c)  $25\text{ }^\circ\text{C}$  for 7 d. FT-IR spectra of pristine HDPE and the HDPE samples after reaction with  $\text{H}_2\text{SO}_4$ ,  $\text{HCl}$ ,  $\text{H}_2\text{O}_2$ ,  $\text{KOH}$ , and  $\text{NaOH}$  at (d)  $25\text{ }^\circ\text{C}$  for 1 d, (e)  $70\text{ }^\circ\text{C}$  for 1 d, and (f)  $25\text{ }^\circ\text{C}$  for 7 d.

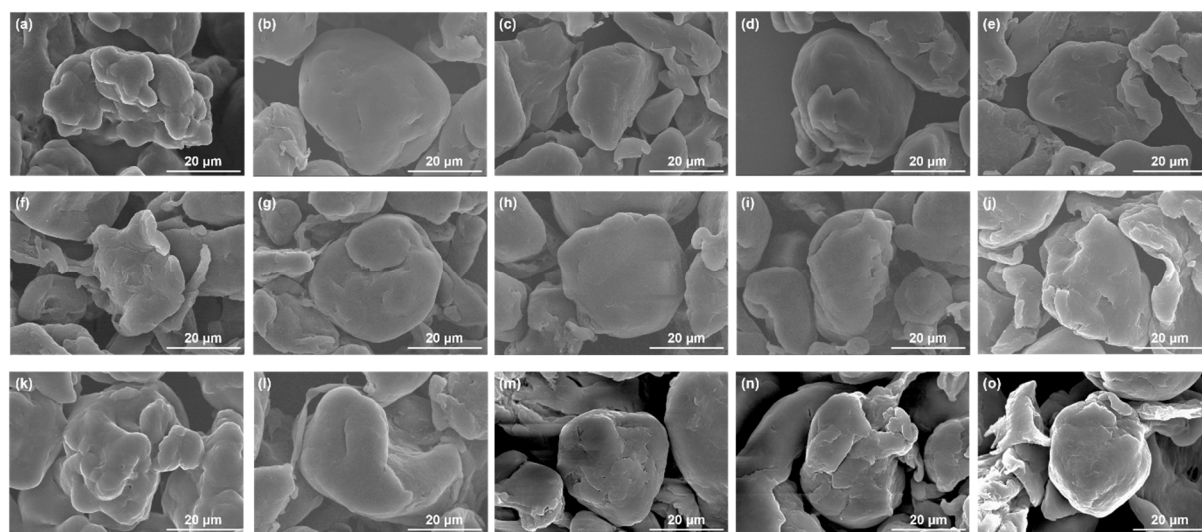

**Figure S8.** SEM images of the HDPE samples after reaction with (a)  $\text{H}_2\text{SO}_4$ , (b)  $\text{HCl}$ , (c)  $\text{H}_2\text{O}_2$ ,



(d) KOH, and (e) NaOH at 25 °C for 1 d. SEM images of the HDPE samples after reaction with (f) H<sub>2</sub>SO<sub>4</sub>, (g) HCl, (h) H<sub>2</sub>O<sub>2</sub>, (i) KOH, and (j) NaOH at 70 °C for 1 d. SEM images of the HDPE samples after reaction with (k) H<sub>2</sub>SO<sub>4</sub>, (l) HCl, (m) H<sub>2</sub>O<sub>2</sub>, (n) KOH, and (o) NaOH at 25 °C for 7 d.

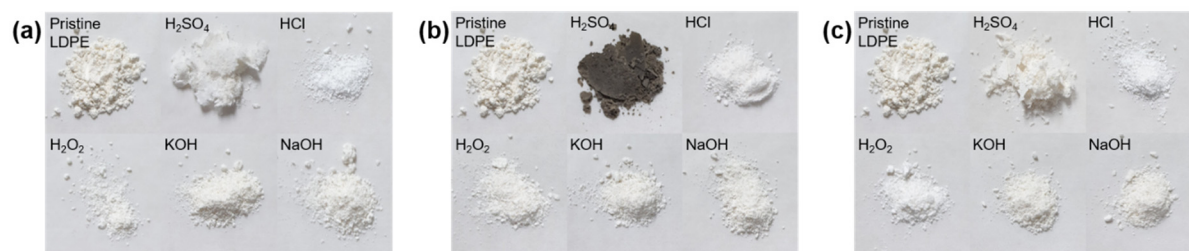

**Figure S9.** Photograph of the LDPE samples in the pristine state and after undergoing chemical stability tests against strong acids and alkalis at (a) 25 °C for 1 d, (b) 70 °C for 1 d, and (c) 25 °C for 7 d.

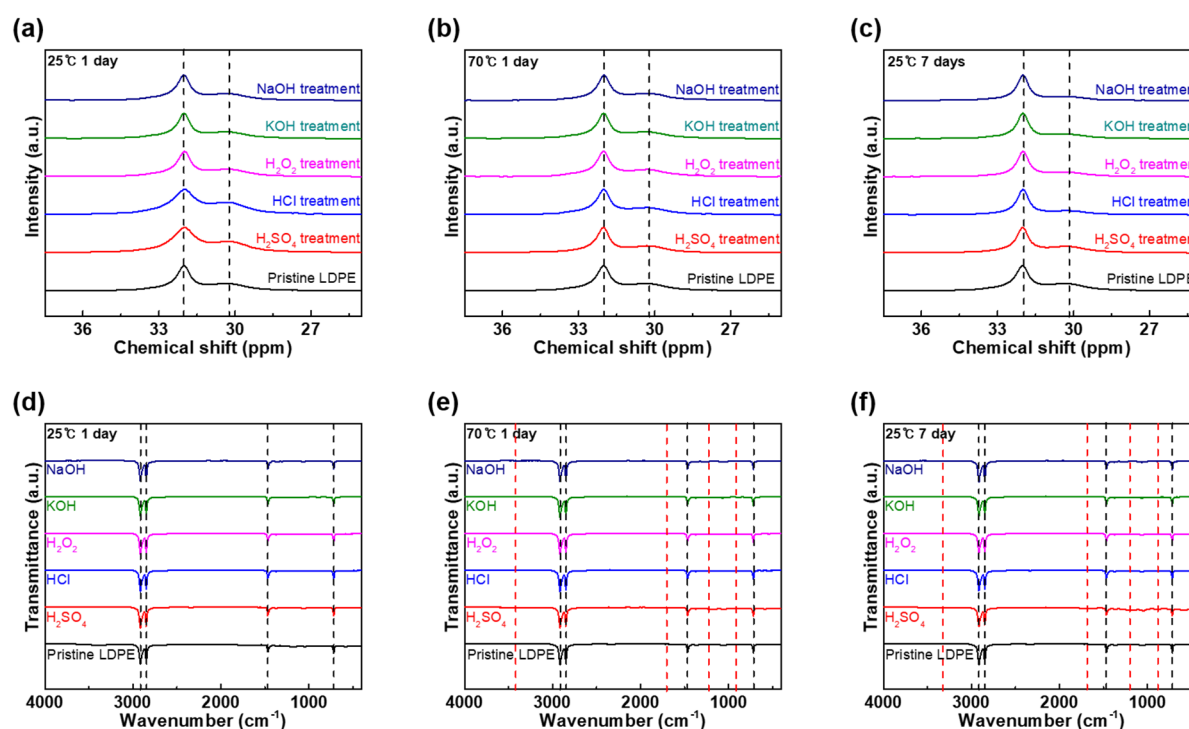

**Figure S10.** <sup>13</sup>C NMR spectra of pristine LDPE and the LDPE samples after reaction with H<sub>2</sub>SO<sub>4</sub>, HCl, H<sub>2</sub>O<sub>2</sub>, KOH, and NaOH at (a) 25 °C for 1 d, (b) 70 °C for 1 d, and (c) 25 °C for 7 d. FT-IR spectra of pristine LDPE and the LDPE samples after reaction with H<sub>2</sub>SO<sub>4</sub>, HCl,

H<sub>2</sub>O<sub>2</sub>, KOH, and NaOH at (d) 25 °C for 1 d, (e) 70 °C for 1 d, and (f) 25 °C for 7 d.

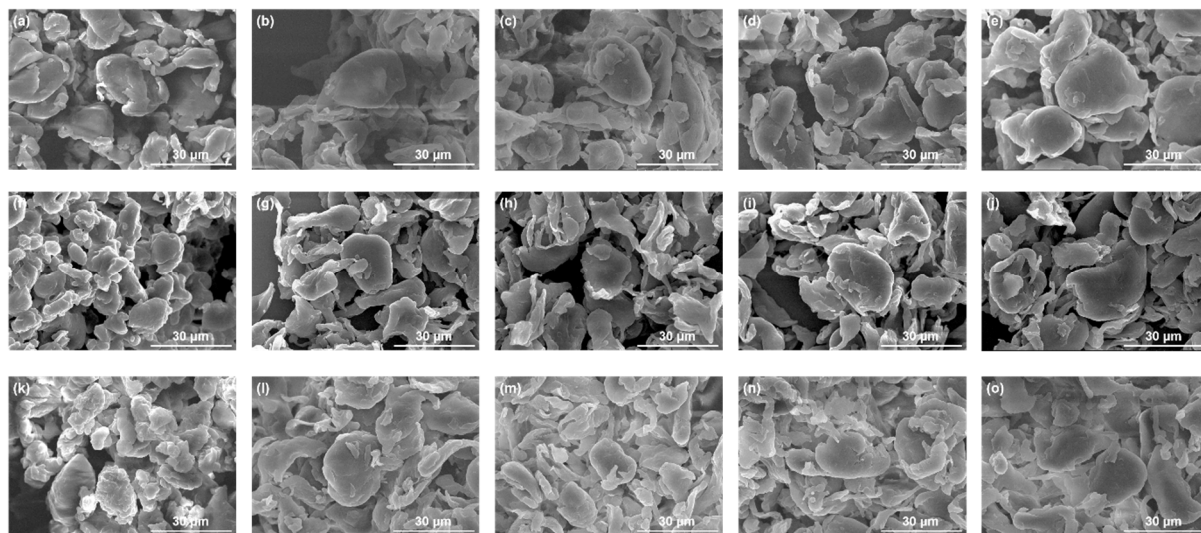

**Figure S11.** SEM images of the LDPE samples after reaction with (a) H<sub>2</sub>SO<sub>4</sub>, (b) HCl, (c) H<sub>2</sub>O<sub>2</sub>, (d) KOH, and (e) NaOH at 25 °C for 1 d. SEM images of the LDPE samples after reaction with (f) H<sub>2</sub>SO<sub>4</sub>, (g) HCl, (h) H<sub>2</sub>O<sub>2</sub>, (i) KOH, and (j) NaOH at 70 °C for 1 d. SEM images of LDPE samples after reaction with (k) H<sub>2</sub>SO<sub>4</sub>, (l) HCl, (m) H<sub>2</sub>O<sub>2</sub>, (n) KOH, and (o) NaOH at 25 °C for 7 d.

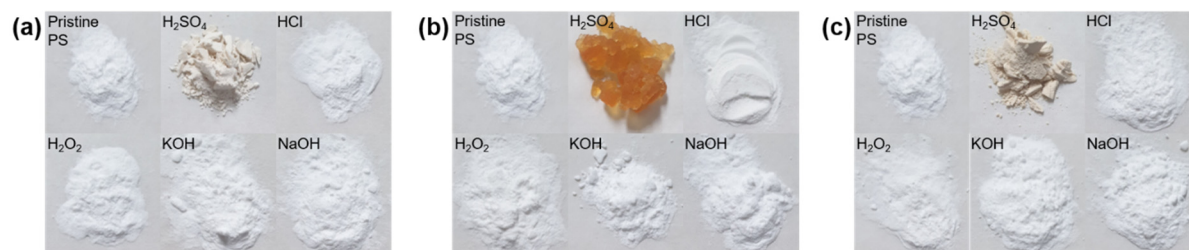

**Figure S12.** Photograph of the PS samples in the pristine state and after chemical stability tests against strong acids and alkalis at (a) 25 °C for 1 d, (b) 70 °C for 1 d, and (c) 25 °C for 7 d.

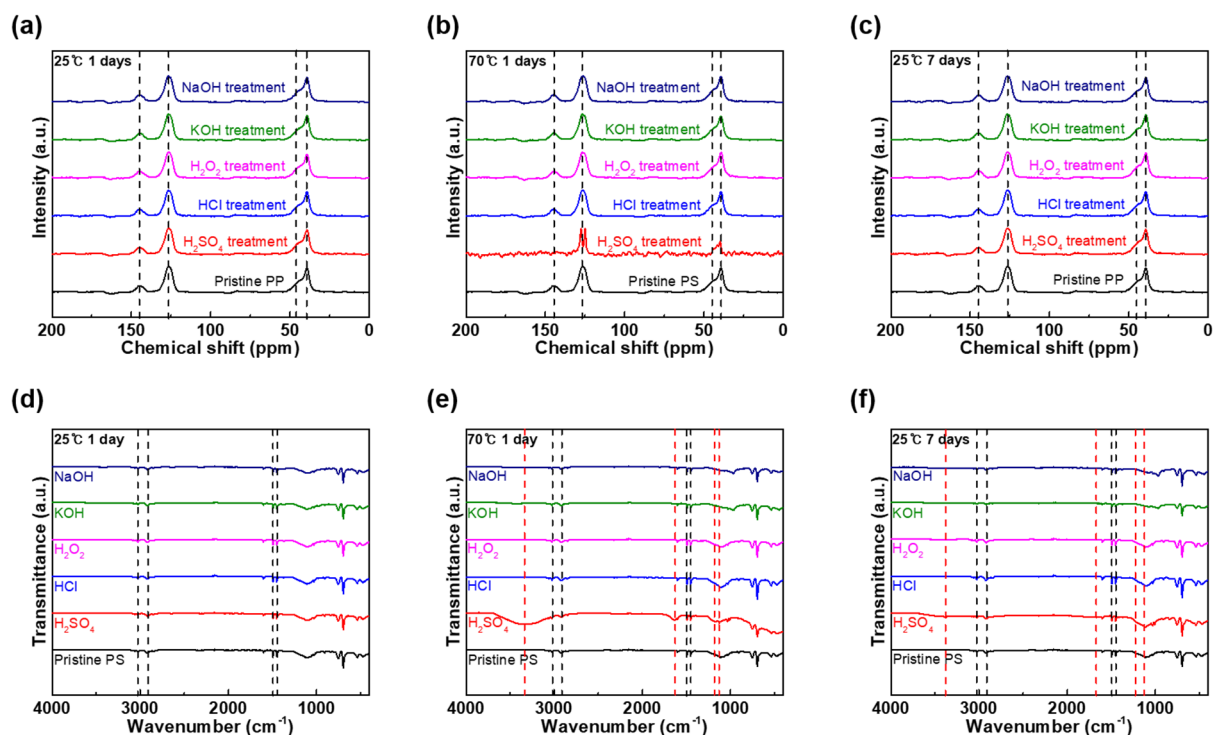

**Figure S13.**  $^{13}\text{C}$  NMR spectra of pristine PS and the PS samples after reaction with  $\text{H}_2\text{SO}_4$ , HCl,  $\text{H}_2\text{O}_2$ , KOH, and NaOH at (a) 25 °C for 1 d, (b) 70 °C for 1 d, and (c) 25 °C for 7 d. FT-IR spectra of pristine PS and the PS samples after reaction with  $\text{H}_2\text{SO}_4$ , HCl,  $\text{H}_2\text{O}_2$ , KOH, and NaOH at (d) 25 °C for 1 d, (e) 70 °C for 1 d, and (f) 25 °C for 7 d.

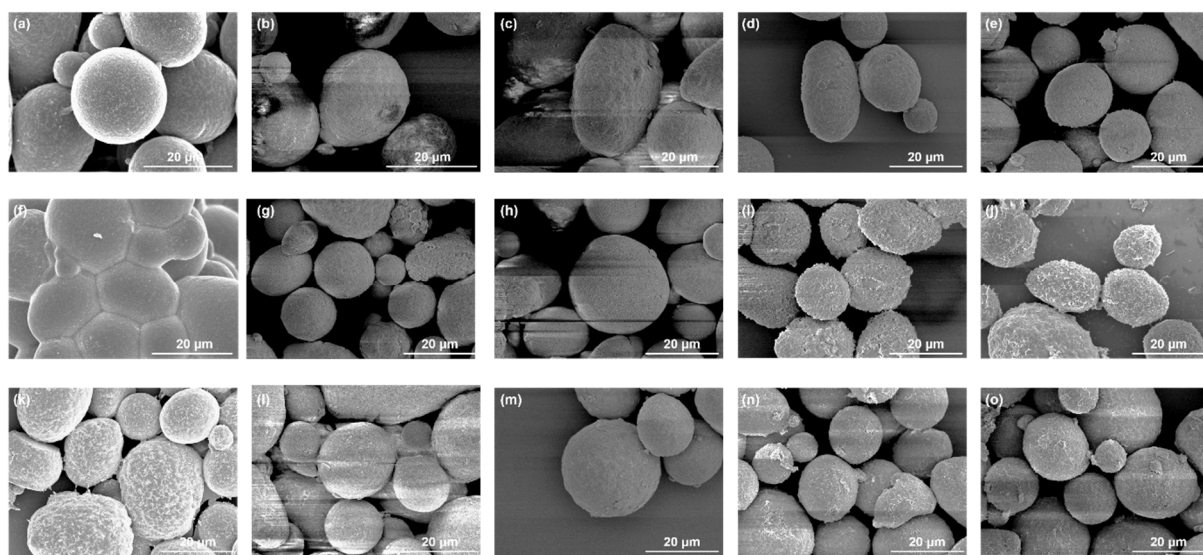

**Figure S14.** SEM images of the PS samples after reaction with (a)  $\text{H}_2\text{SO}_4$ , (b) HCl, (c)  $\text{H}_2\text{O}_2$ , (d) KOH, and (e) NaOH at 25 °C for 1 d. SEM images of the PS samples after reaction with (f)

H<sub>2</sub>SO<sub>4</sub>, (g) HCl, (h) H<sub>2</sub>O<sub>2</sub>, (i) KOH, and (j) NaOH at 70 °C for 1 d. SEM images of the PS samples after reaction with (k) H<sub>2</sub>SO<sub>4</sub>, (l) HCl, (m) H<sub>2</sub>O<sub>2</sub>, (n) KOH, and (o) NaOH at 25 °C for 7 d.

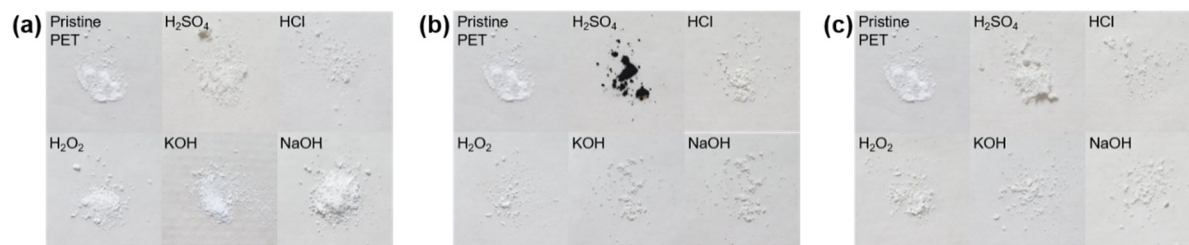

**Figure S15.** Photograph of the PET samples in the pristine state and after chemical stability tests against strong acids and alkalis at (a) 25 °C for 1 d, (b) 70 °C for 1 d, and (c) 25 °C for 7 d.

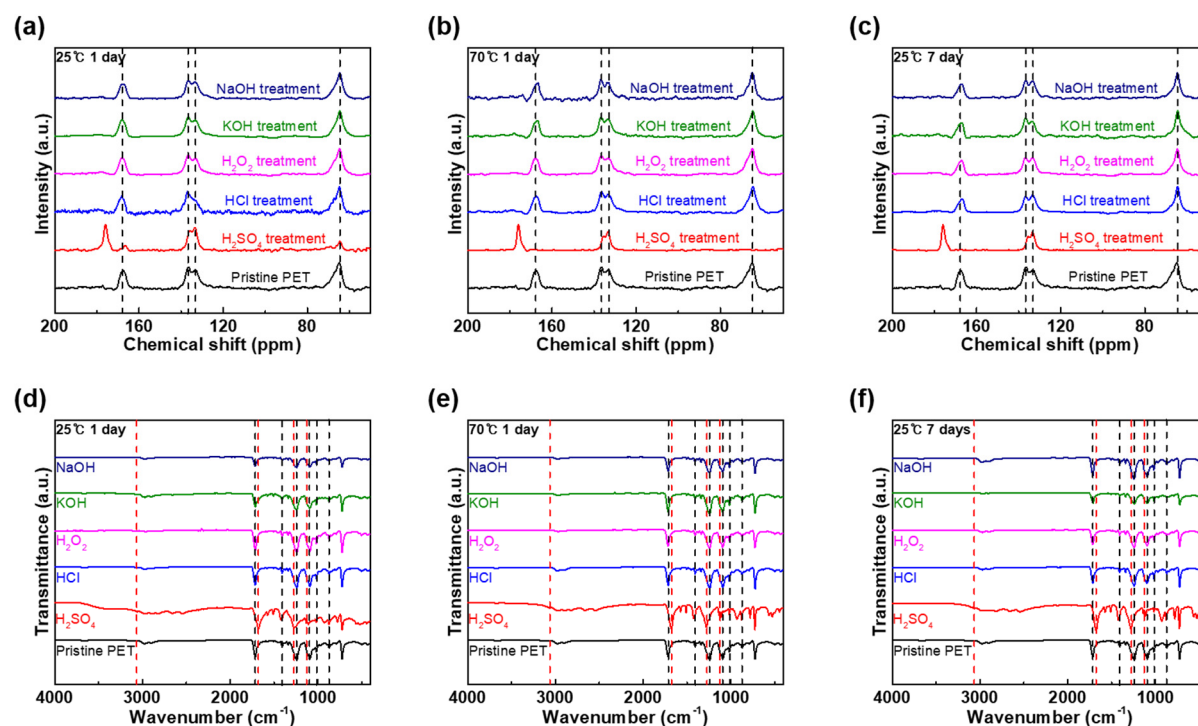

**Figure S16.** <sup>13</sup>C NMR spectra of pristine PET and the PET samples after reaction with H<sub>2</sub>SO<sub>4</sub>, HCl, H<sub>2</sub>O<sub>2</sub>, KOH, and NaOH at (a) 25 °C for 1 d, (b) 70 °C for 1 d, and (c) 25 °C for 7 d. FT-IR spectra of pristine PET and the PET samples after reaction with H<sub>2</sub>SO<sub>4</sub>, HCl, H<sub>2</sub>O<sub>2</sub>, KOH, and NaOH at (d) 25 °C for 1 d, (e) 70 °C for 1 d, and (f) 25 °C for 7 d.



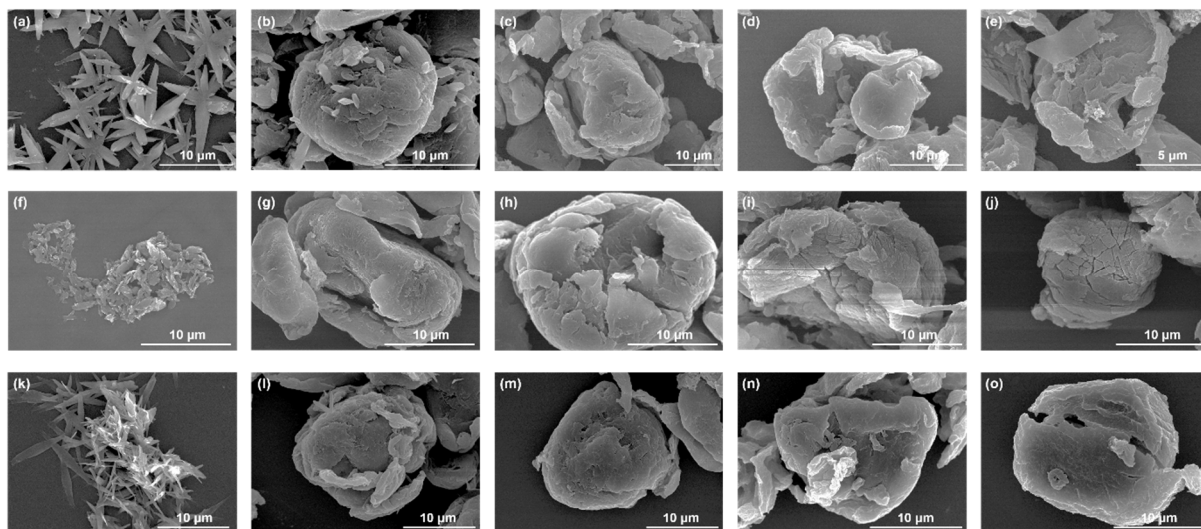

**Figure S17.** SEM images of the PET samples after reaction with (a)  $\text{H}_2\text{SO}_4$ , (b)  $\text{HCl}$ , (c)  $\text{H}_2\text{O}_2$ , (d)  $\text{KOH}$ , and (e)  $\text{NaOH}$  at 25 °C for 1 d. SEM images of the PET samples after reaction with (f)  $\text{H}_2\text{SO}_4$ , (g)  $\text{HCl}$ , (h)  $\text{H}_2\text{O}_2$ , (i)  $\text{KOH}$ , and (j)  $\text{NaOH}$  at 70 °C for 1 d. SEM images of the PET samples after reaction with (k)  $\text{H}_2\text{SO}_4$ , (l)  $\text{HCl}$ , (m)  $\text{H}_2\text{O}_2$ , (n)  $\text{KOH}$ , and (o)  $\text{NaOH}$  at 25 °C for 7 d.

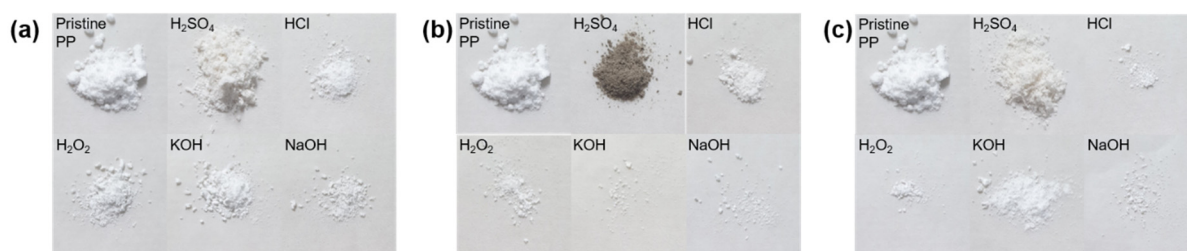

**Figure S18.** Photograph of the PP samples in the pristine state and after chemical stability tests against strong acids and alkalis at (a) 25 °C for 1 d, (b) 70 °C for 1 d, and (c) 25 °C for 7 d.

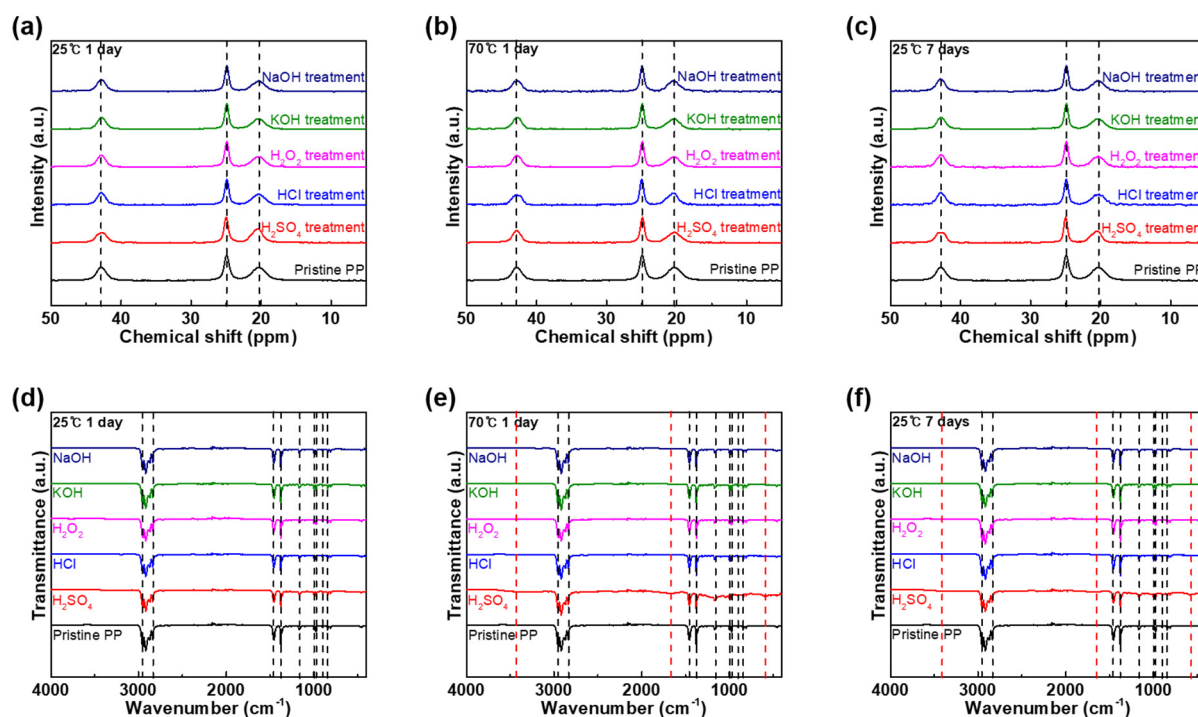

**Figure S19.**  $^{13}\text{C}$  NMR spectra of pristine PP and the PP samples after reaction with  $\text{H}_2\text{SO}_4$ ,  $\text{HCl}$ ,  $\text{H}_2\text{O}_2$ ,  $\text{KOH}$ , and  $\text{NaOH}$  at (a)  $25^\circ\text{C}$  for 1 d, (b)  $70^\circ\text{C}$  for 1 d, and (c)  $25^\circ\text{C}$  for 7 d. FT-IR spectra of pristine PP and the PP samples after reaction with  $\text{H}_2\text{SO}_4$ ,  $\text{HCl}$ ,  $\text{H}_2\text{O}_2$ ,  $\text{KOH}$ , and  $\text{NaOH}$  at (d)  $25^\circ\text{C}$  for 1 d, (e)  $70^\circ\text{C}$  for 1 d, and (f)  $25^\circ\text{C}$  for 7 d.

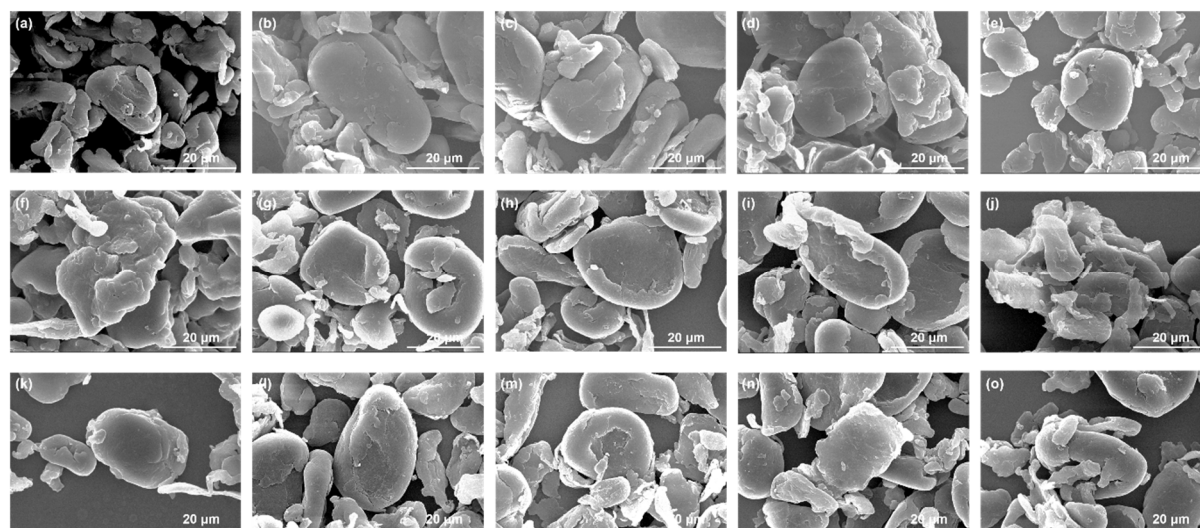

**Figure S20.** SEM images of the PP samples after reaction with (a)  $\text{H}_2\text{SO}_4$ , (b)  $\text{HCl}$ , (c)  $\text{H}_2\text{O}_2$ , (d)  $\text{KOH}$ , and (e)  $\text{NaOH}$  at  $25^\circ\text{C}$  for 1 d. SEM images of the PP samples after reaction with (f)  $\text{H}_2\text{SO}_4$ , (g)  $\text{HCl}$ , (h)  $\text{H}_2\text{O}_2$ , (i)  $\text{KOH}$ , and (j)  $\text{NaOH}$  at  $70^\circ\text{C}$  for 1 d. SEM images of the PP

samples after reaction with (k)  $\text{H}_2\text{SO}_4$ , (l)  $\text{HCl}$ , (m)  $\text{H}_2\text{O}_2$ , (n)  $\text{KOH}$ , and (o)  $\text{NaOH}$  at 25 °C for 7 d.
